# Supplementary material
Source: Springer Nature journal article supplement (https://www.springermedizin.de/resource/supplementary/12961_2012_261_MOESM2_ESM.pdf/9571010)
Supplement: MOESM2 [file 9571010]

Retrieved 1087 documents (376 from the CHR&D compilation, 202 from personal files and 509 from the database search)

Deleted 77 duplicates

Titles and abstracts of 1010 unique references reviewed

Excluded 896 articles that were not eligible according to the inclusion and exclusion criteria

114 full articles reviewed and data extracted and included in the analysis
